# Supplementary material for: Acyl transfer reactions of carbohydrates, alcohols, phenols, thiols and thiophenols under green reaction conditions
Source: Royal Society of Chemistry journal article supplement (doi:10.1039/c4ra16916f), 2015-01-01

## Electronic Supplementary Information

### Acyl transfer reactions of carbohydrates, alcohols, phenols, thiols and thiophenols under green reaction conditions

Santosh Kumar Giri and K. P. Ravindranathan Kartha

Department of Medicinal Chemistry, National Institute of Pharmaceutical Education and Research, SAS Nagar,  
Punjab, 160062, India.

|                                                                          |   |
|--------------------------------------------------------------------------|---|
| 1. <sup>1</sup> H- and <sup>13</sup> C-NMR spectra of new compounds..... | 2 |
|--------------------------------------------------------------------------|---|

# 1. <sup>1</sup>H- and <sup>13</sup>C-NMR spectra

## Phenyl 2,3,4- tri-*O*-acetyl-6-*O*-trityl-1-thio-β-D-glucopyranoside (28)

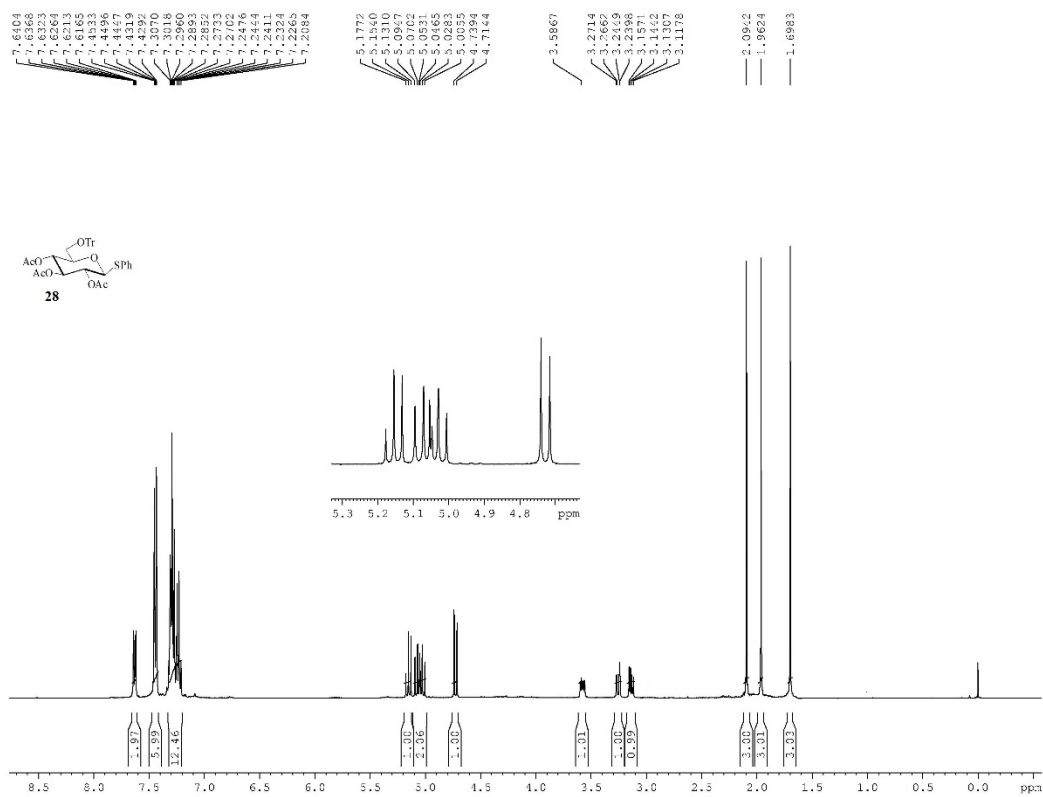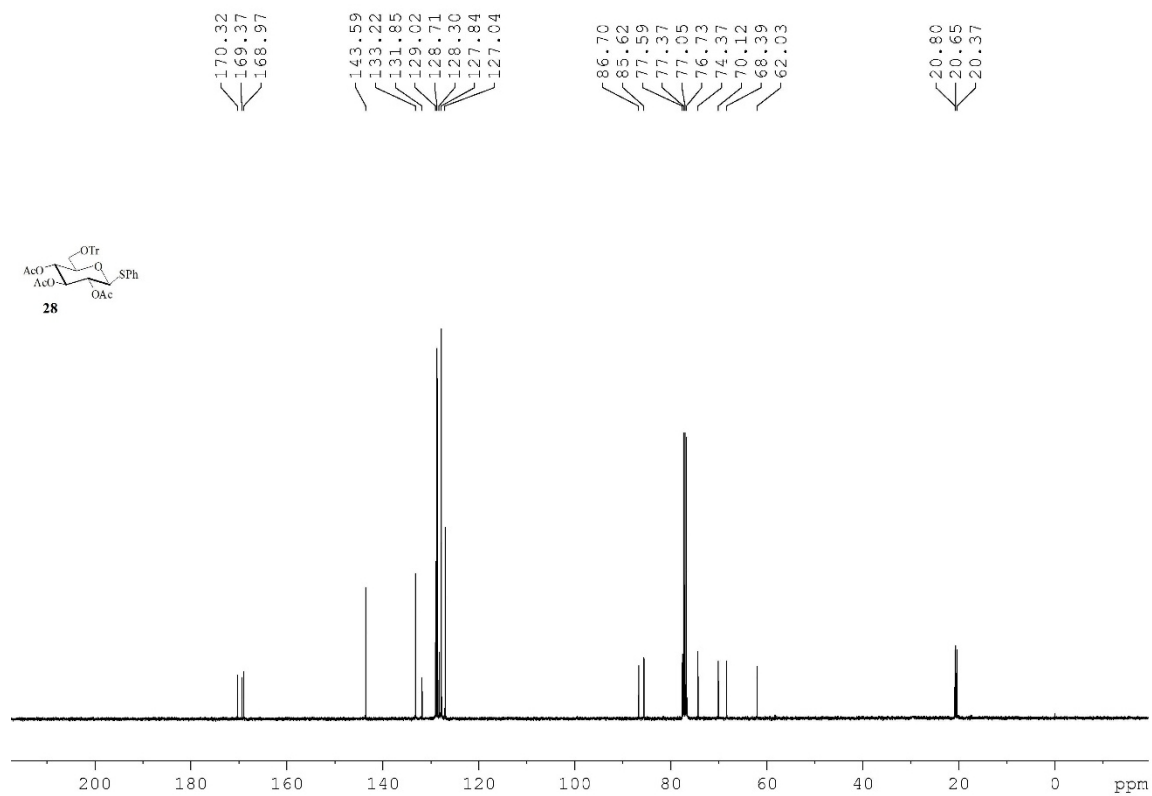

Supplement: c4ra16916f2.pdf [file c4ra16916f2.pdf]
